# Supplementary material for: Progranulin regulates the development and function of NKT2 cells through EZH2 and PLZF
Source: Springer Nature journal article supplement (doi:10.1038/s41418-022-00973-6), 2022-04-21
Supplement: 41418_2022_973_MOESM1_ESM.pdf [file 41418_2022_973_MOESM1_ESM.pdf]

**Important information. Please read.**

- This form should be used by authors to request any change in authorship (adding/deleting authors) including changes in corresponding authors. This form should not be used for name changes. Please fully complete all sections. Use black ink and block capitals and provide each author's full name with the given name first followed by the family name.
- By signing this declaration, all authors guarantee that the order of the authors are in accordance with their scientific contribution, if applicable as different conventions apply per discipline, and that only authors have been added who made a meaningful contribution to the work.
- Please note, in author collaborations where there is formal agreement for representing the collaboration, it is sufficient for the representative or legal guarantor (usually the corresponding author) to complete and sign the Authorship Change Form on behalf of all authors, **next to the added/removed author(s). (Complete Section 3, followed by Section 6.)**  
In author collaborations where there is no formal agreement for representing the collaboration and **there are more than 10 authors**, one may sign for all, provided the signer appends correspondence that attests that each of the authors have agreed to the change **and the added/removed authors sign the form. (Complete Section 3, followed by Section 6.)**
- Please note, we cannot investigate or mediate any authorship disputes. If you are unable to obtain agreement from all authors (including those who you wish to be removed) you must refer the matter to your institution(s) for investigation. Please inform us if you need to do this.
- If you are not able to return a fully completed form within **30 days** of the date that it was sent to the author requesting the change, we may have to withdraw your manuscript. We cannot publish manuscripts where authorship has not been agreed by all authors (including those who have been removed).
- Incomplete forms will be rejected.
- Please return/upload this form, fully completed, to the Journals Editorial Office. The Journal and/or Publisher will consider the information you have provided to decide whether to approve the proposed change in authorship. We may decide to contact your institution for more information or undertake a further investigation, if appropriate, before making a final decision.

Section 1: Please provide the current title of manuscript

Manuscript ID no.: CDD-21-1106RR

Title: Progranulin regulates the development and function of NKT2 cells through EZH2 and PLZF

Section 2: Please provide the previous authorship, in the order shown on the manuscript before the changes were introduced. Please indicate the corresponding author by adding (CA) behind the name.

|             | First name(s) | Family name | ORCID or SCOPUS id, if available |
|-------------|---------------|-------------|----------------------------------|
| 1st author  | Zuo Chen      | Du          |                                  |
| 2nd author  | Lu            | Huang       |                                  |
| 3rd author  | Di            | Yang        |                                  |
| 4th author  | Linlin        | Niu         |                                  |
| 5th author  | Heather       | Miller      |                                  |
| 6th author  | Changshun     | Ruan        |                                  |
| 7th author  | Han           | Li          |                                  |
| 8th author  | Leling        | Hu          |                                  |
| 9th author  | Lijia         | Zhou        |                                  |
| 10th author | Ding          | Jian        |                                  |

Please use an additional sheet if there are more than 10 authors.

|             |          |         |                     |
|-------------|----------|---------|---------------------|
| 11th author | Yan      | Chen    |                     |
| 12th author | Chaohong | Liu(CA) | 0000-0001-7028-4625 |

**Section 3: Please provide a justification for change. Please use this section to explain your reasons for changing the authorship of your manuscript, e.g. what necessitated the change in authorship? Please refer to the (journal) policy pages for more information about authorship. Please explain why omitted authors were not originally included and/or why authors were removed on the submitted manuscript.**

The new added authors have made significant contributions for the revision based on 1) Substantial contributions to conception and design, acquisition of data, or analysis and interpretation of data. 2) Drafting the article or revising it critically for important intellectual content. 3) Final approval of the version to be published.

**Section 4: Proposed new authorship. Please provide your new authorship list in the order you would like it to appear on the manuscript. Please indicate the corresponding author by adding (CA) behind the name. If the Corresponding Author has changed, please indicate the reason under section 3.**

|                         | First name(s) | Family name (this name will appear in full on the final publication and will be searchable in various abstract and indexing databases) | Affiliated institute                                                                                                                                                            | E-mail address         |
|-------------------------|---------------|----------------------------------------------------------------------------------------------------------------------------------------|---------------------------------------------------------------------------------------------------------------------------------------------------------------------------------|------------------------|
| 1 <sup>st</sup> author  | Zuochen       | Du                                                                                                                                     | Chongqing Key Laboratory of Child Infection and Immunity, Children's Hospital of Chongqing Medical University, Chongqing, China                                                 | dzc9036@126.com        |
| 2 <sup>nd</sup> author  | Lu            | Huang                                                                                                                                  | Chongqing Key Laboratory of Child Infection and Immunity, Children's Hospital of Chongqing Medical University, Chongqing, China                                                 | huanglu_86oct@163.com  |
| 3 <sup>rd</sup> author  | Xin           | Dai                                                                                                                                    | Department of Pathogen Biology, Tongji Medical College, Huazhong University of Science and Technology, Wuhan, China                                                             | daixin415@126.com      |
| 4 <sup>th</sup> author  | Di            | Yang                                                                                                                                   | Chongqing Key Laboratory of Child Infection and Immunity, Children's Hospital of Chongqing Medical University, Chongqing, China                                                 | diyang0412@126.com     |
| 5 <sup>th</sup> author  | Linlin        | Niu                                                                                                                                    | Chongqing Key Laboratory of Child Infection and Immunity, Children's Hospital of Chongqing Medical University, Chongqing, China                                                 | niulinlin1986@126.com  |
| 6 <sup>th</sup> author  | Heather       | Miller                                                                                                                                 | The Laboratory of Intracellular Parasites, Rocky Mountain Laboratories, National Institute of Allergy and Infectious Diseases, National Institutes of Health, Bethesda, MD, USA | heather.miller@nih.gov |
| 7 <sup>th</sup> author  | Changshun     | Ruan                                                                                                                                   | Chongqing Key Laboratory of Child Infection and Immunity, Children's Hospital of Chongqing Medical University, Chongqing, China                                                 | ruanchangshun@126.com  |
| 8 <sup>th</sup> author  | Han           | Li                                                                                                                                     | Chongqing Key Laboratory of Child Infection and Immunity, Children's Hospital of Chongqing Medical University, Chongqing, China                                                 | lihan814@126.com       |
| 9 <sup>th</sup> author  | Leling        | Hu                                                                                                                                     | Chongqing Key Laboratory of Child Infection and Immunity, Children's Hospital of Chongqing Medical University, Chongqing, China                                                 | HuLeling123@126.com    |
| 10 <sup>th</sup> author | Lijia         | Zhou                                                                                                                                   | Chongqing Key Laboratory of Child Infection and Immunity, Children's Hospital of Chongqing Medical University, Chongqing, China                                                 | zlj_ch_cq@163.com      |

Please use an additional sheet if there are more than 10 authors.

|             | First name(s) | Family name (this name will appear in full on the final publication and will be searchable in various abstract and indexing databases) | Affiliated institute                                                                                                            | E-mail address        |
|-------------|---------------|----------------------------------------------------------------------------------------------------------------------------------------|---------------------------------------------------------------------------------------------------------------------------------|-----------------------|
| 11st author | Ding          | Jian                                                                                                                                   | Chongqing Key Laboratory of Child Infection and Immunity, Children's Hospital of Chongqing Medical University, Chongqing, China | dingjianqmu@126.com   |
| 12nd author | Jian          | Sun                                                                                                                                    | The Second Department of Pediatrics, Affiliated Hospital of Zunyi Medical University, Zunyi, Guizhou Province, China            | 275551511@qq.com      |
| 13rd author | Xiaoqi        | Shi                                                                                                                                    | The Second Department of Pediatrics, Affiliated Hospital of Zunyi Medical University, Zunyi, Guizhou Province, China            | 411636792@qq.com      |
| 14th author | Pei           | Huang                                                                                                                                  | The Second Department of Pediatrics, Affiliated Hospital of Zunyi Medical University, Zunyi, Guizhou Province, China            | fenglin4620@163.com   |
| 15th author | Yan           | Chen                                                                                                                                   | The Second Department of Pediatrics, Affiliated Hospital of Zunyi Medical University, Zunyi, Guizhou Province, China            | cyz600@163.com        |
| 16th author | Xiaodong      | Zhao(CA)                                                                                                                               | Chongqing Key Laboratory of Child Infection and Immunity, Children's Hospital of Chongqing Medical University, Chongqing, China | zhaofd530@aliyun.com  |
| 17th author | Chaohong      | Liu(CA)                                                                                                                                | Department of Pathogen Biology, Tongji Medical College, Huazhong University of Science and Technology, Wuhan, China             | chaohongliu80@126.com |

**Section 5: Author contribution, Acknowledgement and Disclosures.** Please use this section to provide a new disclosure statement and, if appropriate, acknowledge any contributors who have been removed as authors and ensure you state what contribution any new authors made (if applicable per the journal or book (series) policy). **Please ensure these are updated in your manuscript - after approval of the change(s) - as our production department will not transfer the information in this form to your manuscript.**

**New acknowledgements:**

N/A

**New Disclosures (financial and non-financial interests, funding):**

**FUNDING**

This study was supported by the National Natural Science Foundation of China (32100710).

**COMPETING INTERESTS**

The authors have no financial conflict of interest.

**New Author Contributions statement (if applicable per the journal policy):**

ZCD carried out the initial analyses and drafted the initial manuscript. ZCD, DY, LH, LLN, CSR, HL, LLH and LJZ performed the flow cytometry assay. ZCD, JS, XQS performed the immunoblotting, confocal microscopy, RT-PCR, and ELISA. ZCD and DJ performed the airway hyperresponsiveness. XD performed the plasmid construction and luciferase reporter assay. HM, PH and YC reviewed and revised the manuscript. XDZ and CHL conceptualized and designed the study. Thanks for the discussion with Professor You Sook Cho about our work. All authors approved the final manuscript as submitted and agree to be accountable for all aspects of the work.

State 'Not applicable' if there are no new authors.

**Section 6: Declaration of agreement. All authors, unchanged, new and removed *must* sign this declaration.**

**(NB: Please print the form, (docu)-sign and return/upload a scanned copy. Please note that signatures that have been inserted as an image file are acceptable as long as it is handwritten. Typed names in the signature box are unacceptable.) \* Please delete as appropriate. Delete all of the bold if you were on the original authorship list and are remaining as an author.**

|                         | First name | Family name |                                                                                                                                                                               | Signature      | Date       |
|-------------------------|------------|-------------|-------------------------------------------------------------------------------------------------------------------------------------------------------------------------------|----------------|------------|
| 1 <sup>st</sup> author  | Zuo chen   | Du          | I agree to the proposed new authorship shown in section 4 /and the <b>addition/removal*of my name to the authorship list</b> /and the proposed change in corresponding author | Zuo chen Du    | 2022.2.25  |
| 2 <sup>nd</sup> author  | Lu         | Huang       | I agree to the proposed new authorship shown in section 4 /and the <b>addition/removal*of my name to the authorship list</b> /and the proposed change in corresponding author | Lu Huang       | 2022.2.28  |
| 3 <sup>rd</sup> author  | Xin        | Dai         | I agree to the proposed new authorship shown in section 4 /and the <b>addition/removal*of my name to the authorship list</b> /and the proposed change in corresponding author | Xin Dai        | 2022.2.25  |
| 4 <sup>th</sup> authors | Di         | Yang        | I agree to the proposed new authorship shown in section 4 /and the <b>addition/removal*of my name to the authorship list</b> /and the proposed change in corresponding author | Di Yang        | 2022.02.06 |
| 5 <sup>th</sup> author  | Linlin     | Niu         | I agree to the proposed new authorship shown in section 4 /and the <b>addition/removal*of my name to the authorship list</b> /and the proposed change in corresponding author | Linlin Niu     | 2022.2.25  |
| 6 <sup>th</sup> author  | Heather    | Miller      | I agree to the proposed new authorship shown in section 4 /and the <b>addition/removal*of my name to the authorship list</b> /and the proposed change in corresponding author | Heather Miller | 2022.2.26  |
| 7 <sup>th</sup> author  | Changshun  | Ruan        | I agree to the proposed new authorship shown in section 4 /and the <b>addition/removal*of my name to the authorship list</b> /and the proposed change in corresponding author | Ruan Changshun | 2022.2.25  |

|                         | First name | Family name |                                                                                                                                                                               | Signature                                                                           | Date                                                                                |
|-------------------------|------------|-------------|-------------------------------------------------------------------------------------------------------------------------------------------------------------------------------|-------------------------------------------------------------------------------------|-------------------------------------------------------------------------------------|
| 8 <sup>th</sup> author  | Han        | Li          | I agree to the proposed new authorship shown in section 4 <b>/and the addition/removal*of my name to the authorship list</b> /and the proposed change in corresponding author | 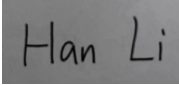 |  |
| 9 <sup>th</sup> author  | Leling     | Hu          | I agree to the proposed new authorship shown in section 4 <b>/and the addition/removal*of my name to the authorship list</b> /and the proposed change in corresponding author |  |  |
| 10 <sup>th</sup> author | Lijia      | Zhou        | I agree to the proposed new authorship shown in section 4 <b>/and the addition/removal*of my name to the authorship list</b> /and the proposed change in corresponding author |  |  |

Please use an additional sheet if there are more than 10 authors.

**In case of author collaborations with formal agreement:**

|                                | Name of consortium/consortia | First name | Family name |                                                                                                                                                                               | Signature | Date |
|--------------------------------|------------------------------|------------|-------------|-------------------------------------------------------------------------------------------------------------------------------------------------------------------------------|-----------|------|
| Representative/legal guarantor | N/A                          |            |             | I agree to the proposed new authorship shown in section 4 <b>/and the addition/removal*of my name to the authorship list</b> /and the proposed change in corresponding author |           |      |

**Both added/removed authors should complete the information in the first table under Section 6.**

## Section 6:

|                          | First name | Family name |                                                                                                                                                                                | Signature                                                                             | Date                        |
|--------------------------|------------|-------------|--------------------------------------------------------------------------------------------------------------------------------------------------------------------------------|---------------------------------------------------------------------------------------|-----------------------------|
| 11 <sup>st</sup> author  | Ding       | Jian        | I agree to the proposed new authorship shown in section 4 / <b>and the addition/removal*of my name to the authorship list</b> /and the proposed change in corresponding author | 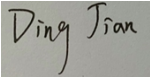   | 2022.2.25                   |
| 12 <sup>nd</sup> author  | Jian       | Sun         | I agree to the proposed new authorship shown in section 4 / <b>and the addition/removal*of my name to the authorship list</b> /and the proposed change in corresponding author |    | 2022.2.25                   |
| 13 <sup>rd</sup> author  | Xiaoqi     | Shi         | I agree to the proposed new authorship shown in section 4 / <b>and the addition/removal*of my name to the authorship list</b> /and the proposed change in corresponding author |    | 2022.02.25                  |
| 14 <sup>th</sup> authors | Pei        | Huang       | I agree to the proposed new authorship shown in section 4 / <b>and the addition/removal*of my name to the authorship list</b> /and the proposed change in corresponding author |    | 25 <sup>th</sup> Feb., 2022 |
| 15 <sup>th</sup> author  | Yan        | Chen        | I agree to the proposed new authorship shown in section 4 / <b>and the addition/removal*of my name to the authorship list</b> /and the proposed change in corresponding author |    | 2022.02.25                  |
| 16 <sup>th</sup> author  | Xiaodong   | Zhao(CA)    | I agree to the proposed new authorship shown in section 4 / <b>and the addition/removal*of my name to the authorship list</b> /and the proposed change in corresponding author |    | 2022.02.27                  |
| 17 <sup>th</sup> author  | Chaohong   | Liu(CA)     | I agree to the proposed new authorship shown in section 4 / <b>and the addition/removal*of my name to the authorship list</b> /and the proposed change in corresponding author |  | 2022.2.28                   |
